# Supplementary material
Source: PubMed Central journal article supplement (PMC5437228)

## Supplementary Material

**Supplementary Figure 1.** (A) IL-33 production in WT and mPGES-1 KO mice bmMFs by ELISA in pg/mL. (B) PGE<sub>2</sub> dose response in mPGES-1 KO and EP<sub>2</sub> KO bmMFs in comparison to WT cells. (C) IL-33 production by LPS stimulation in presence of PKA inhibitor KT5720. (D) Effect of PKA inhibitors H89 and KT5720 on PKA selective cAMP enhanced IL-33 production. (E) Effect of PKB/AKT signaling inhibitors - FPA124 and 10-DEBC in absence or (F) presence of PGE<sub>2</sub>. (G) PGE<sub>2</sub> release by WT bmMFs upon LPS stimulation in presence of p38 MAPK and NF-κB inhibitors. Data are presented as mean (- ±SEM) of at least three independent experiments. Statistical significance was determined using unpaired t-test and one sample t-test (comparing fixed 100%), P value only <0.05 were considered as statistically significant [\*p<0.05, \*\*p<0.005].

**Supplementary Figure 2.** (A) Phospho-CREB and (B) phospho-AKT ELISAs on WT and (mPGES-1 & EP<sub>2</sub>) KOs bmMFs upon LPS stimulation and further agonistic addition. Data are presented as mean (+SEM) of three independent experiments. Statistical significance was determined using unpaired t-test, P value only <0.05 were considered as statistically significant [\*p<0.05]. (C) Levels of Phospho-ERK protein upon LPS stimulation and further addition of PGE<sub>2</sub> and cAMP. (D) Sequences for primers used in this study.

# Supplementary Figure 1

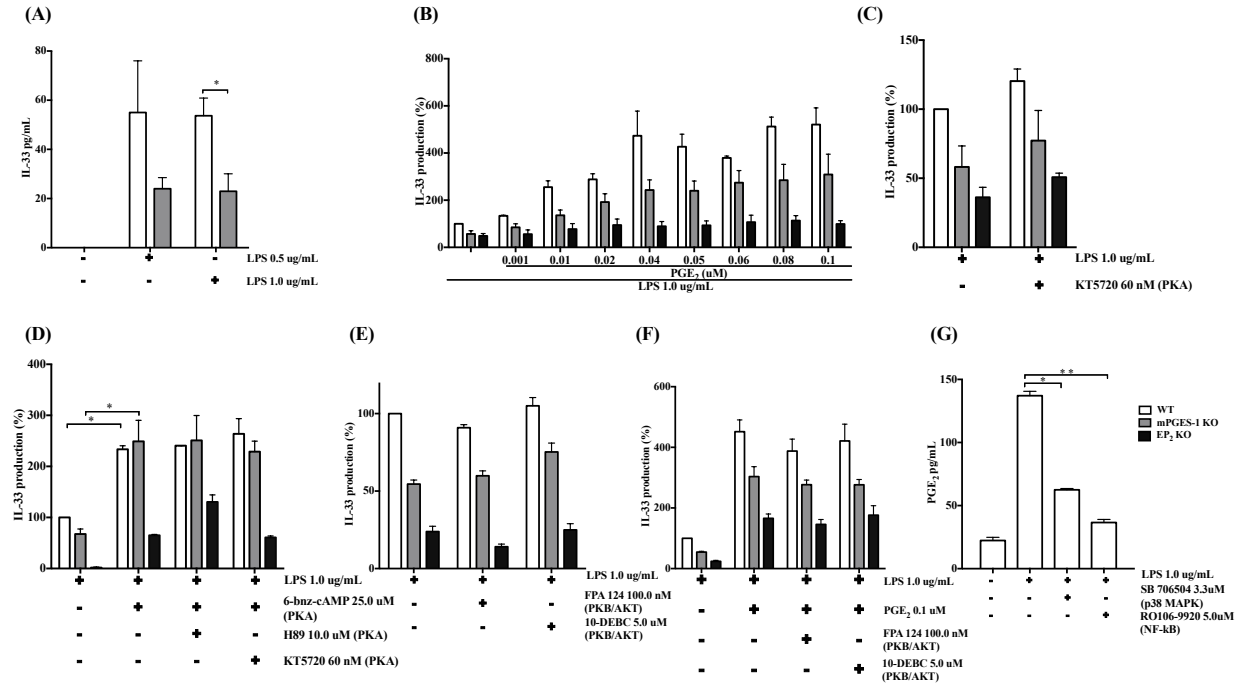

## Supplementary Figure 2

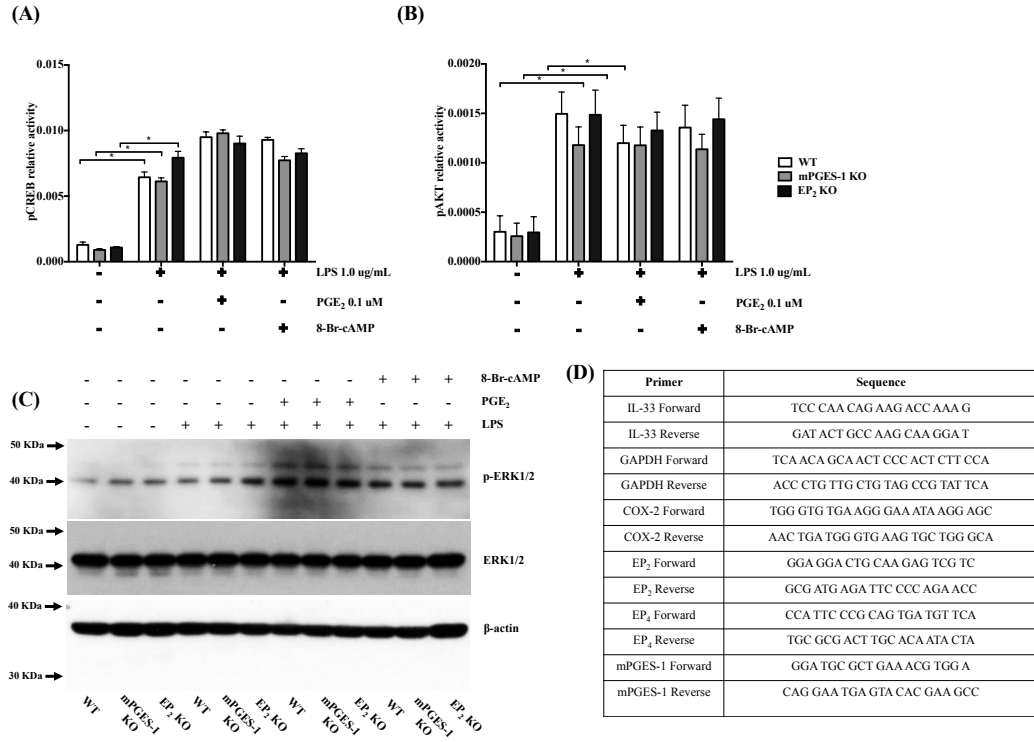

Supplement: 10.1074_M116.769422_jbc.M116.769422-1.pdf [file 10.1074_M116.769422_jbc.M116.769422-1.pdf]
